# Supplementary material
Source: Springer Nature journal article supplement (https://www.springermedizin.de/resource/supplementary/13063_2010_678_MOESM1_ESM.pdf/9618458)
Supplement: MOESM1 [file 9618458]

Health service strengthening  
For essential newborn care  
**All facilities in Dhanusha**

*Exclusion of small and conflict-affected clusters*

**60 clusters**

*Random selection of remaining clusters*

*Stratified Randomisation 1*

**30 clusters**  
Community group intervention

**30 clusters**

*Randomisation 2*

**15 clusters**  
Community group intervention

**15 clusters**  
Community group intervention  
Sepsis management intervention

**15 clusters**  
Sepsis management intervention

**15 clusters**
